# Supplementary material for: Cardiac hypertrophy in a dish: a human stem cell based model
Source: PubMed Central journal article supplement (PMC7522030; doi:10.1242/bio.052381), 2020-09-21
Supplement: biolopen-9-052381-s1.pdf [file biolopen-9-052381-s1.pdf]

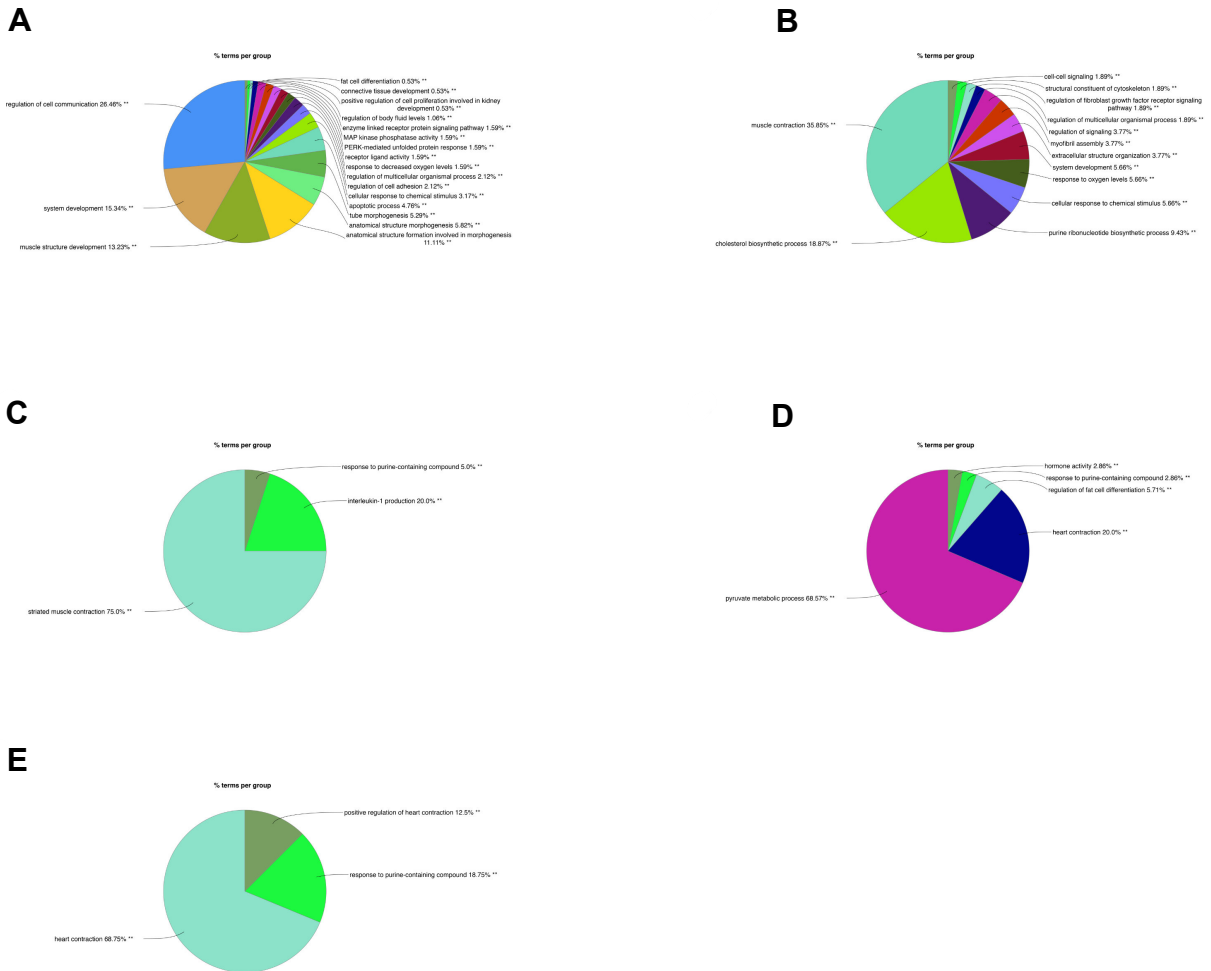

Fig S1

Table S1

[Click here to Download Table S1](#)
